# Supplementary material for: Impact of Bariatric Surgery on Subtilisin/Kexin Type 9 (PCSK9) Gene Expression and Inflammation in the Adipose Tissue of Obese Diabetic Rats
Source: MDPI journal article supplement (doi:10.3390/ijms242316978), 2023-11-30
Supplement: s1 [file s1]

## Supplementary Figures

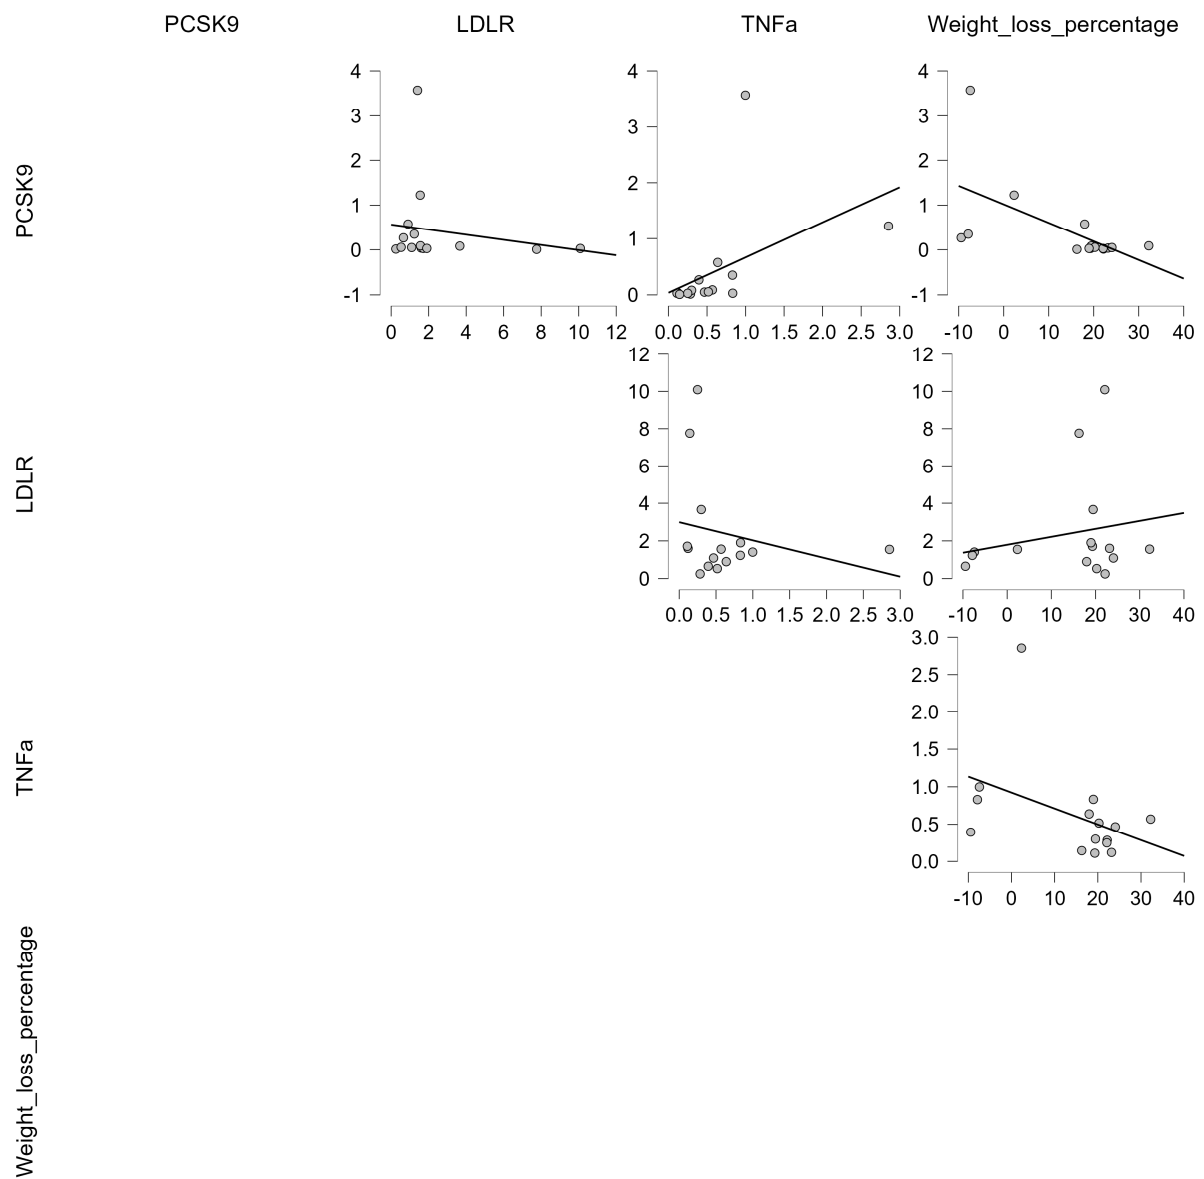

**Supplementary Figure S1: Demonstrating non-significant correlations. All axes apart from weight loss percentage relate to gene expression (fold change)**

### Spearman's Correlations

| Variable                  |                | PCSK9    | TNFa   | Weight_loss_percentage | LDLR |
|---------------------------|----------------|----------|--------|------------------------|------|
| 1. PCSK9                  | Spearman's rho | —        |        |                        |      |
|                           | p-value        | —        |        |                        |      |
| 2. TNFa                   | Spearman's rho | 0.757 ** | —      |                        |      |
|                           | p-value        | 0.002    | —      |                        |      |
| 3. Weight_loss_percentage | Spearman's rho | -0.464   | -0.396 | —                      |      |
|                           | p-value        | 0.083    | 0.145  | —                      |      |
| 4. LDLR                   | Spearman's rho | -0.368   | -0.304 | 0.082                  | —    |
|                           | p-value        | 0.178    | 0.271  | 0.773                  | —    |

\*  $p < .05$ , \*\*  $p < .01$ , \*\*\*  $p < .001$

### Supplementary Table S1
